# Supplementary material
Source: Research Square preprint supplement (doi:10.21203/rs.3.rs-9166828/v1)
Supplement: Supplementary file 1 [file dda9b0d882e07463bdd8e961.docx]

***Appendix: CDC WONDER query parameters***

Database: CDC WONDER Underlying Cause of Death, 1999–2020.

Underlying cause of death: ICD-10 codes C18–C20 (colorectal cancer).

Age: <50 years (EOCRC definition).

Groupings extracted: calendar year; place of death; age group; sex; race; U.S. Census region.

Notes: Hospice facility is available as a distinct place-of-death category beginning in 2003 (2003 revision of the U.S. Standard Certificate of Death). Small cell counts may be suppressed in some stratified queries; therefore, subgroup totals may not sum exactly to overall totals.
